# Supplementary material for: High-performance electrochemical immunosensor based on bimetallic gold/silver functionalized carbon spheres for CYFRA 21-1 detection and information protection
Source: Royal Society of Chemistry journal article supplement (doi:10.1039/d4ay01550a), 2024-01-01
Supplement: d4ay01550a1.pdf [file d4ay01550a1.pdf]

## Supplementary Information

### **High-performance electrochemical immunosensor based on bimetallic gold/silver functionalized carbon spheres for CYFRA 21-1 detection and information protection**

Lin Sheng Wang,<sup>a</sup> Yu Jian Guo,<sup>a</sup> Yu Hao Li,<sup>a</sup> Yong Sen Zhao,<sup>a</sup>  
Qin Wei,<sup>a</sup> and Zhong Feng Gao<sup>\*a</sup>

<sup>a</sup>Key Laboratory of Interfacial Reaction and Sensing Analysis in Universities of Shandong, School of Chemistry and Chemical Engineering, University of Jinan, Jinan 250022, China.

\* Corresponding author:

Zhong Feng Gao, E-mail: chem\_gaozf@ujn.edu.cn

## Reagents and instruments

Sucrose, silver nitrate ( $\text{AgNO}_3$ ), and sodium borohydride ( $\text{NaBH}_4$ ) were all purchased from China National Pharmaceutical Group Chemical Reagent Co., Ltd. Hexadecyltrimethylammonium bromide (CTAB), tetraethyl silicate (TEOS), 3-aminopropyltriethoxysilane (APTES), glutaraldehyde, and chloroauric acid ( $\text{HAuCl}_4$ ) were all purchased from Shanghai McLean Biochemistry Co., Ltd. CYFRA21-1 and antibodies were purchased from Shanghai Lingchao Biotechnology Co., Ltd. The reagents involved are all analytical grade and the water used is ultrapure water (18.25  $\text{M}\Omega/\text{cm}$ ).

The CHI760D electrochemical workstation (Shanghai Chenhua Instrument Co., Ltd.) was used for electrochemical measurements. The scanning electron microscope (SEM) images were obtained from the field emission scanning electron microscope (Gemini300, Zeiss, Germany). X-ray diffraction (XRD) patterns was obtained using the D8 FOCUS diffractometer from Bruker, Germany. The transmission electron microscope (TEM) image was obtained from JEOL JEM 2100F transmission electron microscope (Japan).

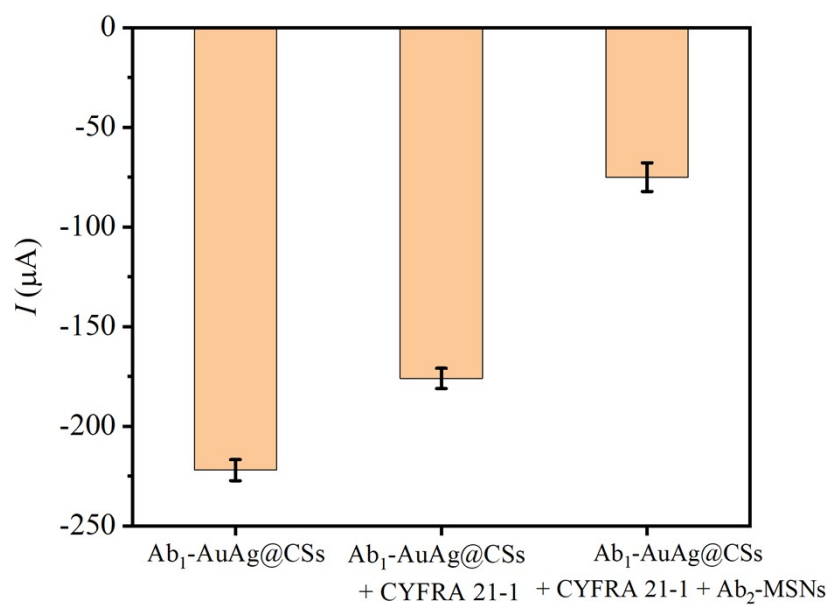

**Fig. S1** The current response in the presence of  $\text{Ab}_1\text{-AuAg@CSs}$ ,  $\text{Ab}_1\text{-AuAg@CSs} + \text{CYFRA 21-1}$ , and  $\text{Ab}_1\text{-AuAg@CSs} + \text{CYFRA 21-1} + \text{Ab}_2\text{-MSNs}$ . Error bars indicate the standard deviation calculated from three replicate measurements.

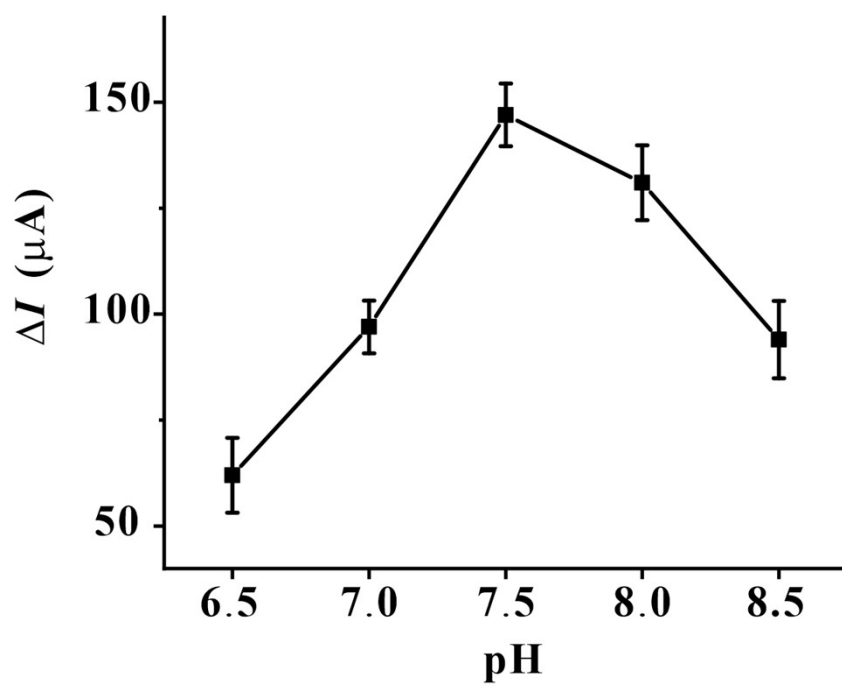

**Fig. S2** Optimization of pH condition for the reaction. Error bars indicate the standard deviation calculated from three replicate measurements.

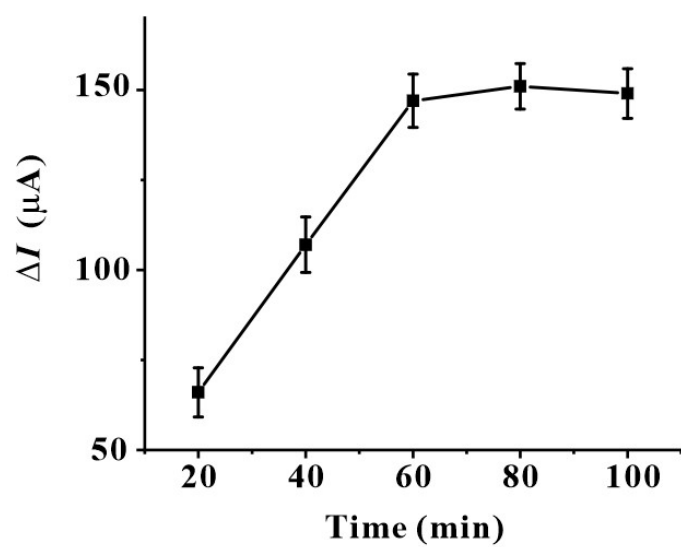

**Fig. S3** Optimization of incubation time for the CYFRA 21-1. Error bars indicate the standard deviation calculated from three replicate measurements.

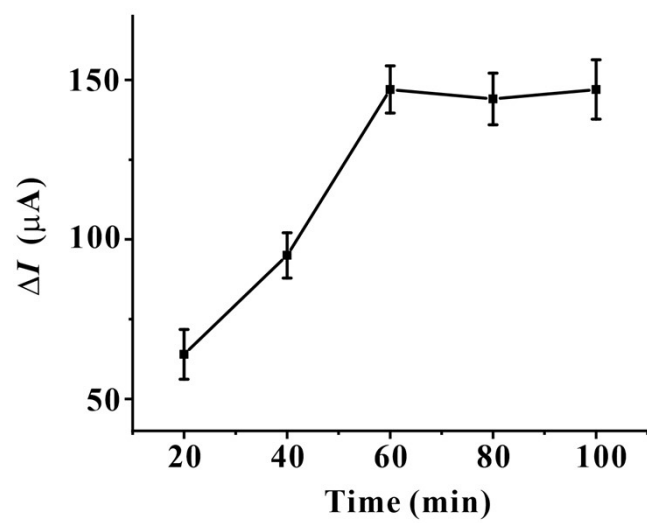

**Fig. S4** Optimization of incubation time for the Ab<sub>2</sub>-MSNs. Error bars indicate the standard deviation calculated from three replicate measurements.

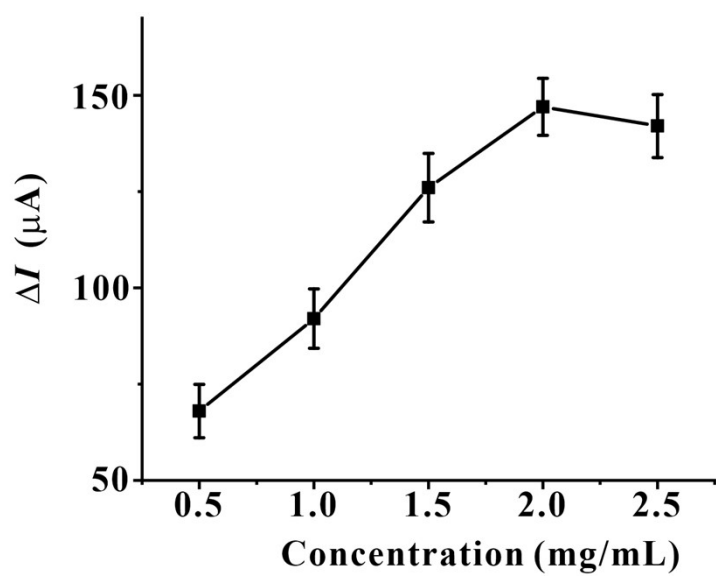

**Fig. S5** Optimization of concentration of the AuAg@CSs. Error bars indicate the standard deviation calculated from three replicate measurements.

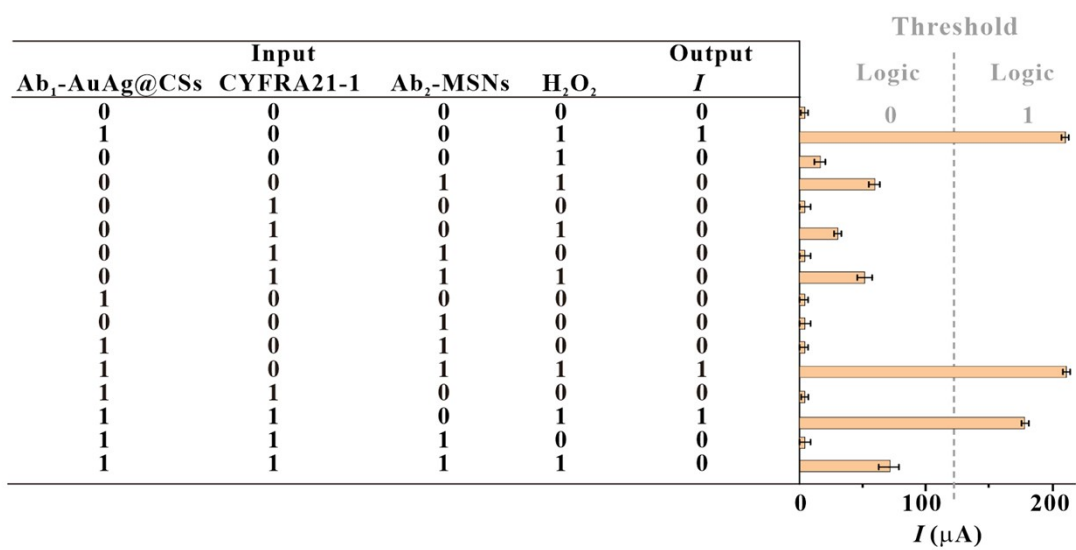

**Fig. S6** The truth table and current responses with different inputs. Error bars indicate the standard deviation calculated from three replicate measurements.



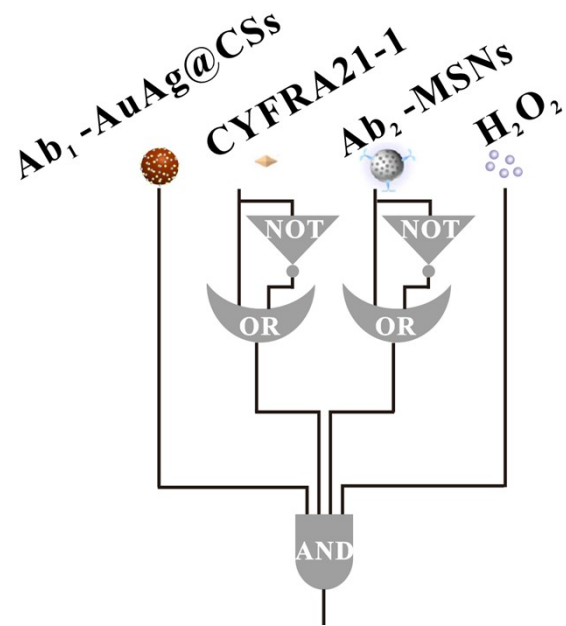

**Fig. S7** The logic gate used in this work.

**Table S1.** Comparison of CYFRA 21-1 detection using other methods with the proposed EC immunosensors.

| Method                         | Linear range<br>(ng/mL) | Detection Limit<br>(pg/mL) | Reference |
|--------------------------------|-------------------------|----------------------------|-----------|
| Electrochemiluminescence       | 0.01–100                | 2.6                        | [1]       |
| Photoelectrochemical           | 0.0001–50               | 0.05                       | [2]       |
| Fluorescence                   | 0.01–100                | 8                          | [3]       |
| Electrochemistry               | 0.1-150                 | 43                         | [4]       |
| Electrochemistry               | 2 – 22                  | 122                        | [5]       |
| Point-of-Care chip             | 0.05-300                | 3                          | [6]       |
| Backscattering- interferometry | 0.1-100                 | 230                        | [7]       |
| Electrochemiluminescence       | 0.00750-50.0            | 1.89                       | [8]       |
| Electrochemistry               | 0.0001–10               | 0.031                      | This work |

**Table S2.** Recovery results of CYFRA 21-1 in 100-fold diluted serum samples

| Sample<br>(ng/mL) | Addition<br>(ng/mL) | Average<br>(ng/mL) | RSD<br>(%, <i>n</i> =5) | Recovery (%) |
|-------------------|---------------------|--------------------|-------------------------|--------------|
| 0                 | 1.00                | 0.97               | 3.2                     | 97.0         |
|                   | 3.00                | 3.07               | 4.1                     | 102.3        |
|                   | 5.00                | 5.19               | 2.9                     | 103.8        |

## Reference

- [1] L. Zhou, L. Yang, C. Wang, H. Jia, J. Xue, Q. Wei, H. Ju, *Talanta*, 2022, **238**, 123047.
- [2] Y. Zhang, T. Wu, Q. Cui, Z. Qu, Y. Zhang, H. Ma, Q. Wei, *Biosens. Bioelectron.*, 2023, **222**, 114992.
- [3] N. A. Alarfaj, M. F. El-Tohamy, H. F. Oraby *Nanoscale Res. Lett.*, 2020, **15**, 12.
- [4] Y. Zeng, J. Bao, Y. Zhao, D. Huo, M. Chen, Y. Qi, M. Yang, H. Fa, C. Hou, *Bioelectrochemistry*, 2018, **120**, 183-189,
- [5] G. Sener, E. Ozgur, A.Y. Rad, L. Uzun, R. Say, A. Denizli, *Analyst*, 2013, **138**, 6422-6428.
- [6] Y. Li, J. Xuan, Y. J. Song, W. J. Qi, B. S. He, P. Wang, L. D. Qin, *ACS Nano*, 2016, **10**, 1640-1647.
- [7] R. O. Ian, H. Mohamed, K. Amanda, H. Megan, Li. Ming, P. M. Pierre, J. B. Darryl, R. *Anal. Chem.*, 2014, 86, 7566-7574.
- [8] X. J. Li, Y. Du, H. Wang, H. M. Ma, D. Wu, X. Ren, Q. Wei, J. J. Xu, *Anal. Chem.*, 2020, **92**, 12693-12699.
